# Supplementary material
Source: PubMed Central journal article supplement (PMC6579458)
Supplement: supp_RA119.008180_143966_2_supp_322342_pqsb07.pdf [file supp_RA119.008180_143966_2_supp_322342_pqsb07.pdf]

Supporting Information

Dual inhibition of glutaminase and carnitine palmitoyltransferase decreases growth and migration of glutaminase inhibition-resistant triple-negative breast cancer cells

**Larissa Menezes dos Reis<sup>1,2†</sup>, Douglas Adamoski<sup>1,2†</sup>, Rodolpho Ornitiz Oliveira Souza<sup>3</sup>, Caroline Fernanda Rodrigues Ascensão<sup>1,2</sup>, Krishina Ratna Sousa de Oliveira<sup>1,2</sup>, Felipe Corrêa da Silva<sup>2,4</sup>, Fábio Malta de Sá Patroni<sup>1,2</sup>, Marília Meira Dias<sup>1</sup>, Sílvio Roberto Consonni<sup>5</sup>, Pedro Manoel Mendes de Moraes Vieira<sup>4</sup>, Ariel Mariano Silber<sup>3</sup>, Sandra Martha Gomes Dias<sup>1\*</sup>**

†These authors contributed equally to the work.

From the <sup>1</sup>Brazilian Biosciences National Laboratory (LNBio), Center for Research in Energy and Materials (CNPEM), 13083-970, Campinas, São Paulo, Brazil. <sup>2</sup>Graduate Program in Genetics and Molecular Biology, Institute of Biology, University of Campinas- UNICAMP, Campinas, SP, Brazil. <sup>3</sup>Department of Parasitology, Laboratory of Biochemistry of Tryps (LaBTryps), Institute of Biomedical Science, University of São Paulo - USP, 05508-000, São Paulo, SP, Brazil. <sup>4</sup>Department of Genetics, Evolution, and Bioagents, Laboratory of Immunometabolism, Institute of Biology, University of Campinas-UNICAMP, 13083-970, Campinas, SP, Brazil. <sup>5</sup>Department of Biochemistry and Tissue Biology, Laboratory of Citochemistry and Immunocitochemistry, Institute of Biology, University of Campinas- UNICAMP, Campinas, SP, Brazil.

Running Title: *CPT1 compensates GLS inhibition in TN breast cancer*

**Figure S1**

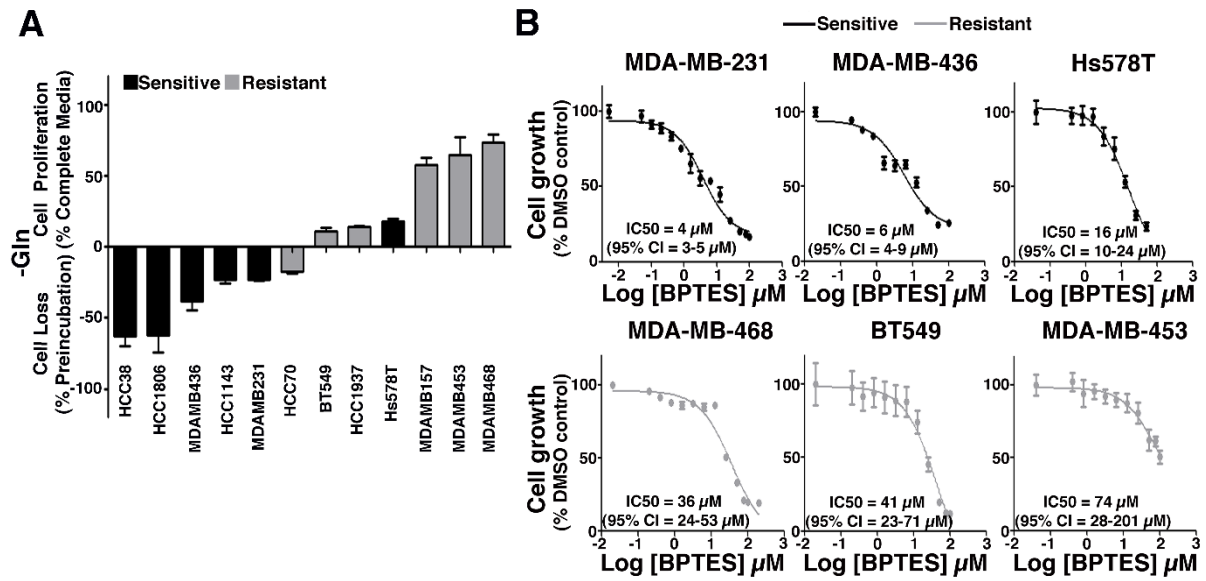

**Fig. S1. TNBC cell lines have heterogeneous glutamine-withdraw sensitivity and BPTES IC<sub>50</sub> over cell growth.** A, Growth response of 12 TNBC cell lines incubated with glutamine-deprived RPMI medium for 4 days. B, Growth response of 6 TNBC incubated with increasing amounts of BPTES, another glutaminase inhibitor, for 2 days. IC<sub>50</sub> value and 95% confidence interval (CI) is presented as an inset. Graphics in A-B represent the mean  $\pm$  standard deviation (SD) of n = 4.

Figure S2

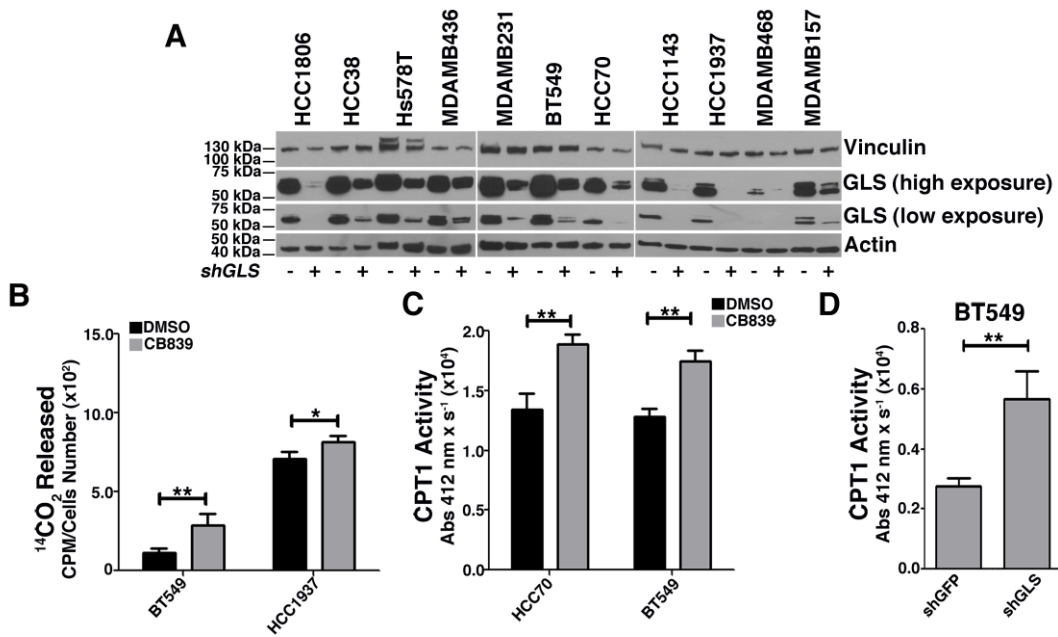

**Fig. S2. Resistant cell lines respond to GLS attenuation by increasing beta-oxidation.** *A*, *GLS* knockdown efficiency in 11 TNBC cell lines as shown by western blot (except MDA-MB-453). *B*, Beta-oxidation was directly measured by quantifying <sup>14</sup>CO<sub>2</sub> released from uniformly labeled (<sup>14</sup>C)-palmitic acid. The resistant cell lines BT549 and HCC1937 released more <sup>14</sup>CO<sub>2</sub> when treated with CB-839 compared to DMSO. *C*, CPT1 activity increase in the resistant BT549 and HCC70 cell lines after CB-839 incubation compared to DMSO. *D*, CPT1 activity increased in the resistant BT549 cell line after *GLS* knockdown. Graphics in *B-D* represent the mean ± SD of n = 3. Student t-test was applied; p < 0.05 (\*), p < 0.01 (\*\*).

Figure S3

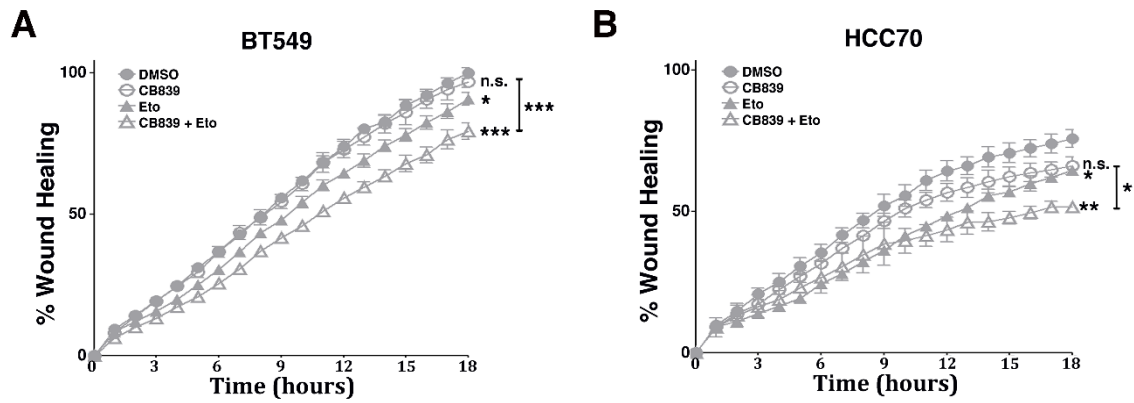

**Fig. S3. Etomoxir and CB-839 combined treatment promoted a further decrease in the migration of resistant cell lines.** Combined CB-839 + etomoxir treatment further decreased cell migration in the resistant BT549 (A) and HCC70 (B) cell lines compared to individual treatments. Graphics in A-B represent the mean  $\pm$  SD of  $n = 4$ . Student t-test was applied;  $p < 0.05$  (\*),  $p < 0.01$  (\*\*),  $p < 0.001$  (\*\*\*), n.s., non-significant. Whenever not indicated comparison was made against DMSO control.

Figure S4

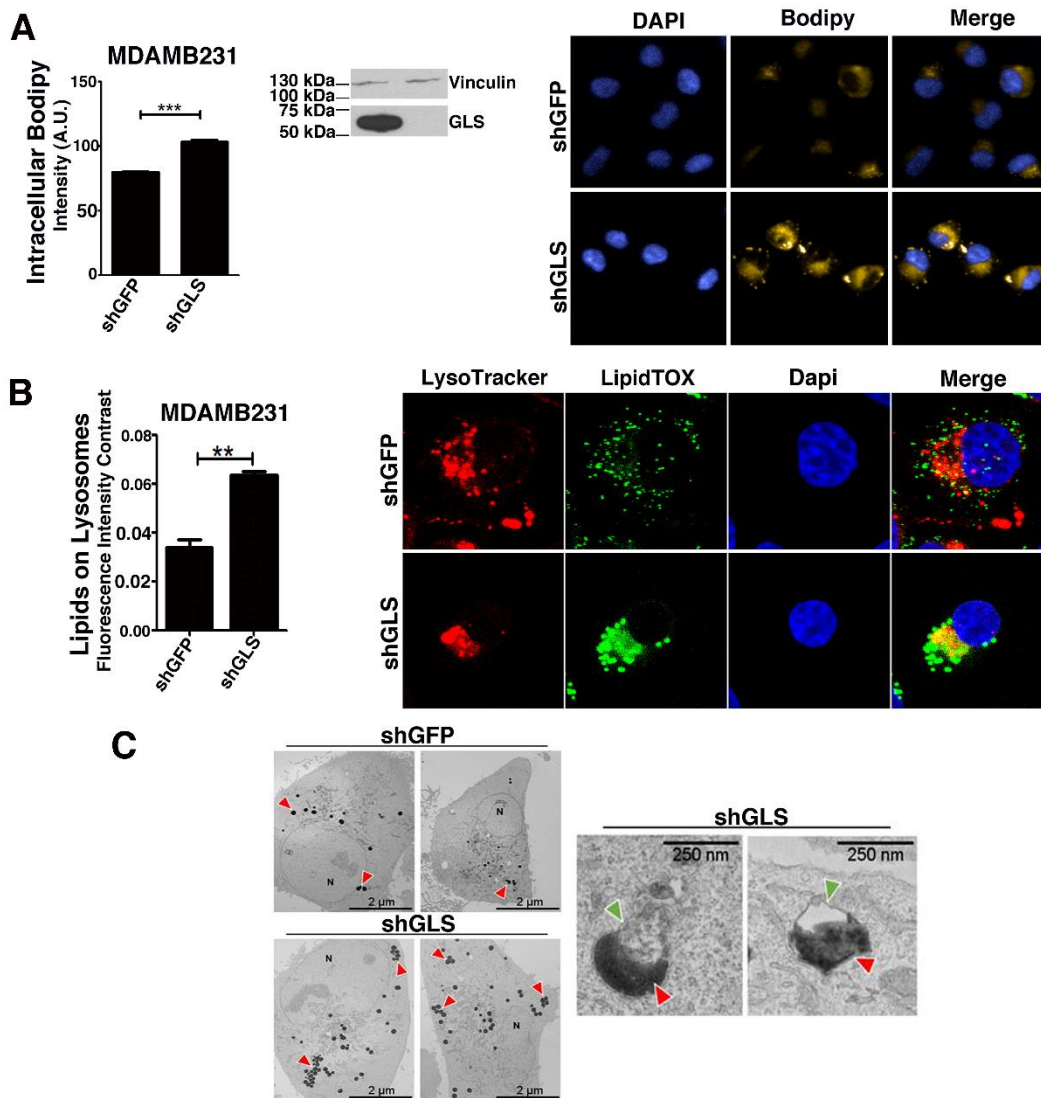

**Fig. S4. MDA-MB-231 cell line responds to *GLS* knockdown by increasing FA intake and lipid droplets mobilization to lysosomes.** *A*, MDA-MB-231 responded to *GLS* knockdown by capturing more C1-BODIPY 500/510 C12 fatty acid (Bodipy) from the medium. Fluorescence microscopy images on the right depicting a higher signal in cells with knocked down *GLS*. *B*, *GLS* knockdown drove cells to a higher mobilization of neutral lipid droplets (as identified by the specific marker Lipidtox) to lysosomes (stained by Lisotracker), implying lipophagy in these cells. Confocal fluorescence microscopy maximum projection images depicting lysosome and neutral lipid droplet co-staining (in yellow) in cells with *GLS* knocked down; Nuclei were stained with DAPI. *C*, On the left, transmission electron micrographs (TEM) of shGFP and shGLS cells showing a visual enrichment on lipid droplets (red arrowheads) on cells with *GLS* knocked down. N = nucleus. On the right, TEM displaying fusion between lipid droplets (red arrowheads) and autophagosomes (green arrowheads) found on shGLS cells.

**Table S1.** List of genes DE between resistant and sensitive cell lines and enriched pathways which are related to lipid metabolism ( $\log_2 FC \geq +1$  or  $\log_2 FC \leq -1$ ,  $padj \leq 0.05$ ).

| <b>GO pathway term</b>                                                        | <b>padj</b> | <b>DE genes</b>                                                                                                                                                                                                                                                                                                                                              |
|-------------------------------------------------------------------------------|-------------|--------------------------------------------------------------------------------------------------------------------------------------------------------------------------------------------------------------------------------------------------------------------------------------------------------------------------------------------------------------|
| <b>Lipid metabolic process</b><br>GO:0006629                                  | 0.00008     | <i>ABCG1, ACOT1, ACSS2, ALDH1A2, ANKRD1, APOBR, CHKB-CPT1B, CISH, CLN3, CPT1B, CRAT, CYP26A1, CYP26B1, CYP27B1, DGKG, EFR3B, FGF21, GGPS1, GPC2, INPP5A, ISYNA1, OSBPL5, PAFAH2, CK2, PDSS1, PIK3C2B, PIK3R1, PLA2G3, PLA2G4B, PLA2G6, PRLR, SERINC4, SESN2, SLC16A11, SLC44A4, STARD10, SULT1E1, TBXAS1, TM7SF2, TMEM150A, TMEM86A, TRIB3, TTC39B, XBP1</i> |
| <b>Lipid biosynthetic process</b><br>GO:0008610                               | 0.00120     | <i>ABCG1, ACSS2, ADGRF5, ALDH1A2, CYP27B1, GGPS1, ISYNA1, PDSS1, PIK3C2B, PIK3R1, PLA2G6, PRLR, SERINC4, TBXAS1, TM7SF2, TRIB3, XBP1</i>                                                                                                                                                                                                                     |
| <b>Cellular lipid metabolic process</b><br>GO:00044255                        | 0.00131     | <i>ABCG1, ACSS2, ACOT1, ADGRF5, ALDH1A2, APOBR, CLN3, CPT1B, CRAT, CYP26A1, CYP26B1, EFR3B, GGPS1, GHR, GPC2, HELZ2, INPP5A, ISYNA1, PDSS1, PDPN, PIK3C2B, PIK3R1, PLA2G3, PLA2G4B, PLA2G6, SERINC4, SESN2, TBXAS1, TMEM150A, TRIB3, XBP1</i>                                                                                                                |
| <b>Phospholipid biosynthetic process</b><br>GO:0008654                        | 0.00400     | <i>ADGRF5, GGPS1, ISYNA1, PIK3C2B, PIK3R1, PLA2G6, SERINC4, XBP1</i>                                                                                                                                                                                                                                                                                         |
| <b>Phospholipid metabolic process</b><br>GO:0006644                           | 0.00691     | <i>ADGRF5, CLN3, EFR3B, INPP5A, ISYNA1, GGPS1, PIK3C2B, PIK3R1, PLA2G3, PLA2G4B, PLA2G6, SERINC4, TMEM150A, XBP1</i>                                                                                                                                                                                                                                         |
| <b>Fatty acid derivative metabolic process</b><br>GO:1901568                  | 0.00808     | <i>ACSS3, GGTA1P, PLA2G3, PLA2G4B, TBXAS1</i>                                                                                                                                                                                                                                                                                                                |
| <b>Phospholipid transport</b><br>GO:0015914                                   | 0.01141     | <i>ABCG1, ATP10A, OSBPL5</i>                                                                                                                                                                                                                                                                                                                                 |
| <b>Positive regulation of phospholipid biosynthetic process</b><br>GO:0071073 | 0.01384     | <i>ADGRF5, XBP1</i>                                                                                                                                                                                                                                                                                                                                          |
| <b>Fatty acid metabolic process</b><br>GO:0006631                             | 0.02225     | <i>ACOT1, ACSS2, CPT1B, CRAT, GHR, PDPN, PLA2G3, PLA2G4B, SESN2, TBXAS1, TRIB3, XBP1</i>                                                                                                                                                                                                                                                                     |
| <b>Acyl carnitine transport</b><br>GO:0006844                                 | 0.02472     | <i>CPT1B, CRAT</i>                                                                                                                                                                                                                                                                                                                                           |
| <b>Acyl carnitine transmembrane transport</b><br>GO:1902616                   | 0.02472     | <i>CPT1B, CRAT</i>                                                                                                                                                                                                                                                                                                                                           |

---

|                                                                      |         |                                                                                   |
|----------------------------------------------------------------------|---------|-----------------------------------------------------------------------------------|
| <b>Cholesterol biosynthetic process</b><br>GO:0045540                | 0.03002 | <i>ABCG1</i>                                                                      |
| <b>Regulation of phospholipid biosynthetic process</b><br>GO:0071071 | 0.03731 | <i>ADGRF5, XBP1</i>                                                               |
| <b>Carnitine metabolic process</b><br>GO:0009437                     | 0.03967 | <i>CPT1B, CRAT</i>                                                                |
| <b>Unsaturated fatty acid metabolic process</b><br>GO:0033559        | 0.04735 | <i>PDPN, PLA2G4B, TBXAS1</i>                                                      |
| <b>Lipid transport</b><br>GO:0006869                                 | 0.04841 | <i>ABCG1, APOBR, ATP10A, CPT1B, DISP3, OSBPL5, PLA2G6, SLCO2A1, STARD10, FZD4</i> |

---

**Table S2.** List of genes DE between resistant and sensitive cell lines, which were related to the pathways listed in Table S1. Genes related to beta-oxidation and lipid catabolism are in bold.

| Gene                  | log2(FC)<br>(Resistant/Sensitive) | padj     | Gene                     | log2(FC)<br>(Resistant/Sensitive) | padj     |
|-----------------------|-----------------------------------|----------|--------------------------|-----------------------------------|----------|
| <i>ATP10A</i>         | -5.14                             | 3.3E-12  | <i>TM7SF2</i>            | 2.24                              | 0.010333 |
| <i>IGFBP1</i>         | -4.32                             | 0.001869 | <i>ISYNA1</i>            | 2.28                              | 0.012792 |
| <i>PDPN</i>           | -4.03                             | 0.005988 | <i>EFR3B</i>             | 2.28                              | 0.023631 |
| <i>ANKRD1</i>         | -3.84                             | 0.004141 | <b><i>PLA2G6</i></b>     | 2.28                              | 0.007354 |
| <i>ADGRF5</i>         | -3.72                             | 0.009985 | <i>SERINC4</i>           | 2.39                              | 0.033476 |
| <i>DGKG</i>           | -3.45                             | 0.018184 | <b><i>CHKB-CPT1B</i></b> | 2.39                              | 0.009758 |
| <i>CYP26A1</i>        | -3.01                             | 0.035812 | <i>GPC2</i>              | 2.40                              | 0.004141 |
| <i>ACSS3</i>          | -2.95                             | 0.031423 | <i>APOBR</i>             | 2.40                              | 0.035456 |
| <i>TBXAS1</i>         | -2.25                             | 0.005988 | <i>CYP27B1</i>           | 2.40                              | 0.017153 |
| <i>CYP26B1</i>        | -2.05                             | 0.028926 | <b><i>CRAT</i></b>       | 2.46                              | 0.026845 |
| <i>PDSS1</i>          | -1.46                             | 0.002857 | <i>OSBPL5</i>            | 2.47                              | 0.0052   |
| <i>INPP5A</i>         | -1.40                             | 0.004229 | <i>SLC16A11</i>          | 2.57                              | 0.040341 |
| <i>PAFAH2</i>         | 1.02                              | 0.003687 | <i>TMEM86A</i>           | 2.59                              | 0.022815 |
| <i>ACSS2</i>          | 1.13                              | 0.044733 | <i>PRLR</i>              | 2.62                              | 0.013213 |
| <i>GGPS1</i>          | 1.24                              | 0.025419 | <i>STARD10</i>           | 2.71                              | 0.004409 |
| <b><i>ACOT1</i></b>   | 1.40                              | 0.031423 | <i>GNA14</i>             | 2.78                              | 0.045759 |
| <i>CLN3</i>           | 1.51                              | 0.014323 | <i>FGF21</i>             | 2.85                              | 0.045759 |
| <i>TMEM150A</i>       | 1.56                              | 0.030933 | <i>CISH</i>              | 2.86                              | 0.003657 |
| <i>FZD4</i>           | 1.58                              | 0.033288 | <i>XBPI</i>              | 2.86                              | 0.000323 |
| <b><i>SESN2</i></b>   | 1.60                              | 0.026989 | <i>CREB3L4</i>           | 3.02                              | 0.000323 |
| <b><i>CPT1B</i></b>   | 1.68                              | 0.049406 | <i>SLCO2A1</i>           | 3.06                              | 0.008565 |
| <i>PIK3C2B</i>        | 1.73                              | 0.046818 | <i>ABCG1</i>             | 3.25                              | 0.010536 |
| <i>HELZ2</i>          | 1.82                              | 0.04533  | <i>GHR</i>               | 3.30                              | 0.028926 |
| <i>TTC39B</i>         | 1.89                              | 0.043085 | <i>DISP3</i>             | 3.37                              | 0.00075  |
| <i>TRIB3</i>          | 1.95                              | 0.013852 | <b><i>PLA2G3</i></b>     | 3.90                              | 0.003395 |
| <i>PIK3R1</i>         | 1.95                              | 0.003009 | <i>SULT1E1</i>           | 3.92                              | 0.002022 |
| <b><i>PLA2G4B</i></b> | 2.02                              | 0.047481 | <i>ALDH1A2</i>           | 3.98                              | 0.00103  |
| <i>PCK2</i>           | 2.18                              | 0.000678 | <i>SLC44A4</i>           | 4.40                              | 0.000433 |



**Table S3.** List of genes DE between low and high *GLS* breast tumors related to the “fatty acid oxidation process” (intersection between GO #0006631 and GO # 0019395).

| GeneSymbol     | log2FC<br>(low/high) | padj     | GeneSymbol      | log2FC<br>(low/high) | padj     |
|----------------|----------------------|----------|-----------------|----------------------|----------|
| <i>SLC27A2</i> | 2.69                 | 2.88E-31 | <i>SCP2</i>     | 0.42                 | 7.24E-07 |
| <i>ACOX2</i>   | 2.67                 | 2E-36    | <i>ADIPOR1</i>  | 0.42                 | 4.95E-09 |
| <i>PLIN5</i>   | 2.48                 | 1.54E-26 | <i>ETFDH</i>    | 0.39                 | 1.25E-08 |
| <i>ACSM1</i>   | 2.14                 | 6.77E-36 | <i>ACOT8</i>    | 0.37                 | 7.11E-06 |
| <i>CRAT</i>    | 2.10                 | 1.73E-36 | <i>AUH</i>      | 0.34                 | 4.23E-06 |
| <i>ECI1</i>    | 1.47                 | 1.1E-45  | <i>CPT1B</i>    | 0.33                 | 0.012091 |
| <i>IVD</i>     | 1.35                 | 2.33E-47 | <i>ACAT1</i>    | 0.33                 | 0.001647 |
| <i>ECI2</i>    | 1.32                 | 1.01E-27 | <i>AKT2</i>     | 0.33                 | 3.62E-07 |
| <i>DECR2</i>   | 1.22                 | 2.92E-29 | <i>HADH</i>     | 0.31                 | 0.000157 |
| <i>ACADS</i>   | 1.18                 | 3.16E-19 | <i>HACL1</i>    | 0.23                 | 0.001316 |
| <i>CROT</i>    | 1.16                 | 1.11E-16 | <i>PECR</i>     | 0.21                 | 0.035404 |
| <i>ETFB</i>    | 0.95                 | 1.9E-10  | <i>PEX2</i>     | 0.18                 | 0.008166 |
| <i>PEX7</i>    | 0.86                 | 3.59E-26 | <i>SLC25A17</i> | 0.17                 | 0.012334 |
| <i>ECHDC2</i>  | 0.80                 | 5.19E-14 | <i>MLYCD</i>    | 0.17                 | 0.029296 |
| <i>ADIPOR2</i> | 0.79                 | 8.96E-13 | <i>MTOR</i>     | -0.19                | 0.008311 |
| <i>ACOX3</i>   | 0.76                 | 3.97E-16 | <i>ACOX1</i>    | -0.24                | 0.003667 |
| <i>AMACR</i>   | 0.76                 | 8.54E-16 | <i>HIBCH</i>    | -0.32                | 0.000182 |
| <i>CPT1A</i>   | 0.75                 | 2.53E-09 | <i>PHYH</i>     | -0.32                | 0.006093 |
| <i>ECH1</i>    | 0.75                 | 1.23E-15 | <i>PEX13</i>    | -0.34                | 4.51E-07 |
| <i>ECHS1</i>   | 0.74                 | 1.94E-17 | <i>EHHADH</i>   | -0.35                | 0.003127 |
| <i>HSD17B4</i> | 0.74                 | 6.41E-15 | <i>PPARD</i>    | -0.36                | 1.26E-05 |
| <i>IRS1</i>    | 0.73                 | 5.13E-06 | <i>PRKAG2</i>   | -0.39                | 5.09E-07 |
| <i>ACAA1</i>   | 0.72                 | 3.6E-18  | <i>MAPK14</i>   | -0.42                | 1.59E-12 |
| <i>ALDH3A2</i> | 0.71                 | 1.2E-08  | <i>ABCD1</i>    | -0.42                | 0.000509 |
| <i>ETFBKMT</i> | 0.66                 | 8.34E-14 | <i>ACAT2</i>    | -0.43                | 0.000287 |
| <i>TYSND1</i>  | 0.65                 | 9.82E-16 | <i>ACAA2</i>    | -0.44                | 1.81E-05 |
| <i>ABCD3</i>   | 0.63                 | 6.24E-11 | <i>PRKAA1</i>   | -0.59                | 1.59E-08 |
| <i>ACACB</i>   | 0.60                 | 4.23E-05 | <i>ACAD11</i>   | -0.70                | 1.48E-08 |
| <i>APPL2</i>   | 0.60                 | 1.63E-14 | <i>ECHDC1</i>   | -0.81                | 2.78E-13 |
| <i>AKT1</i>    | 0.58                 | 1.27E-13 | <i>ALOX12</i>   | -0.88                | 4.04E-09 |
| <i>ACAD10</i>  | 0.55                 | 2.31E-17 | <i>NR4A3</i>    | -1.16                | 3.17E-11 |
| <i>ACOXL</i>   | 0.55                 | 0.006364 | <i>DGAT2</i>    | -1.20                | 2.09E-13 |
| <i>ACADVL</i>  | 0.54                 | 7.56E-10 | <i>ADH7</i>     | -1.46                | 0.011757 |
| <i>LONP2</i>   | 0.53                 | 2.13E-09 | <i>PPARA</i>    | -1.62                | 1.31E-52 |
| <i>CPT2</i>    | 0.48                 | 1.57E-12 | <i>ABCD2</i>    | -2.25                | 2.43E-36 |
| <i>GCDH</i>    | 0.48                 | 6.12E-08 | <i>PPARGC1A</i> | -2.64                | 1.45E-24 |
| <i>SESN2</i>   | 0.47                 | 1.06E-06 | <i>HAO1</i>     | -6.64                | 1.97E-54 |
| <i>MCAT</i>    | 0.43                 | 8.8E-07  |                 |                      |          |
